# Supplementary material for: Small sample sizes in the study of ontogenetic allometry; implications for palaeobiology
Source: PeerJ journal article supplement (doi:10.7717/peerj.818), 2015-03-10

Variable 7: Slope = 1.13

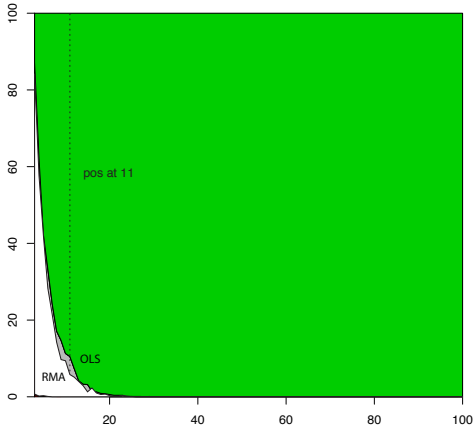

Variable 20: Slope = 1.07

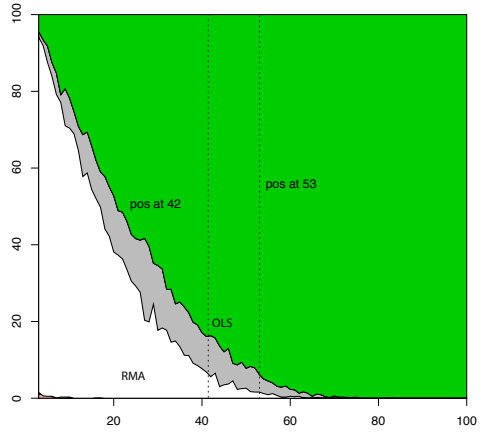

Variable 18: Slope = 1.09

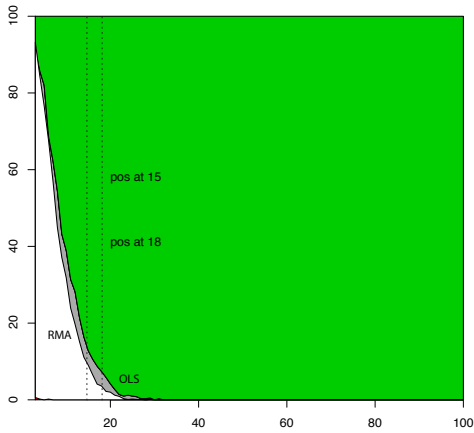

Variable 16: Slope = 1.05

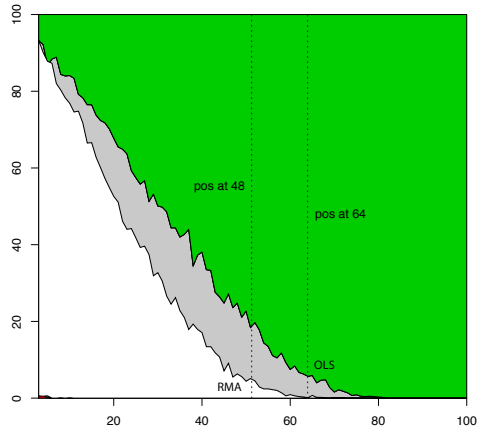

Variable 1: Slope = 1.05

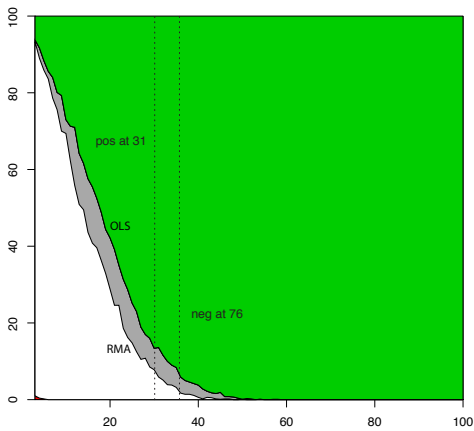

Variable 2: Slope = 1.02

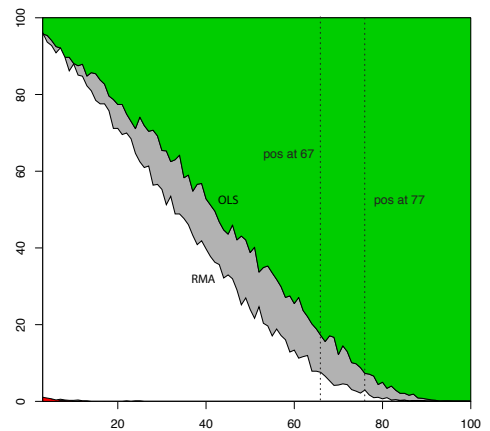

Variable 11: Slope = 1.04

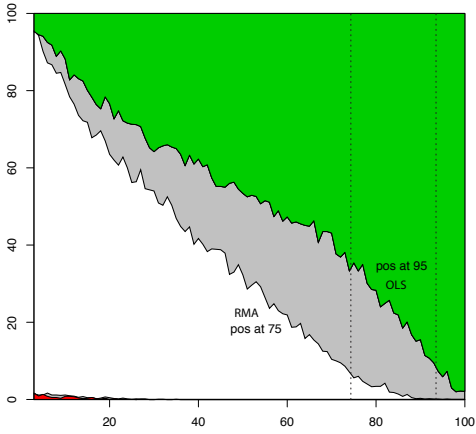

Variable 8: Slope = 1.01

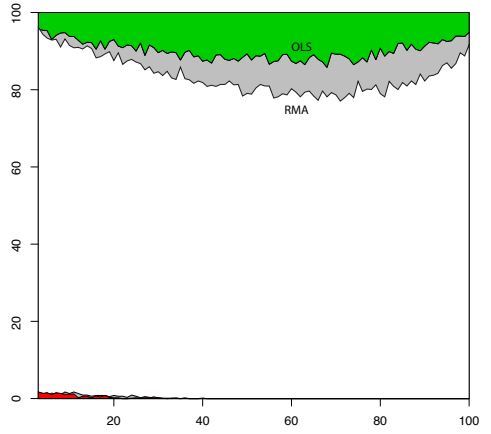

Variable 19: Slope = 1.03

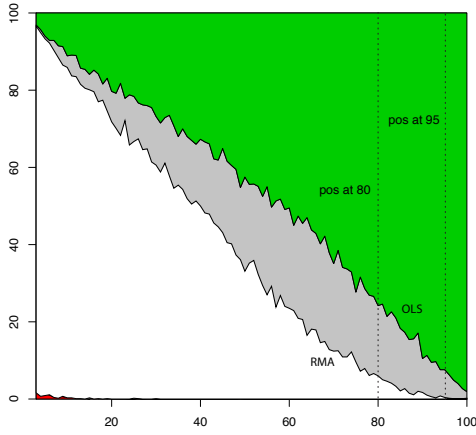

Variable 3: Slope = 1.03

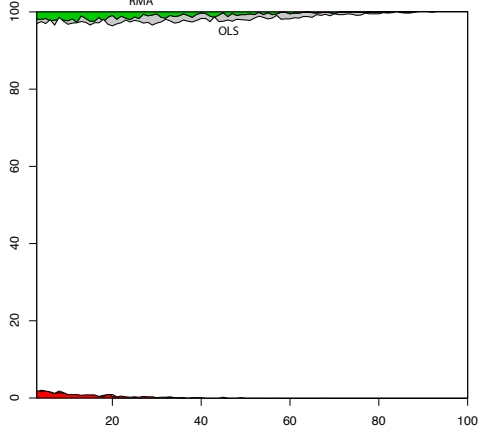

Variable 4: Slope = 1.02

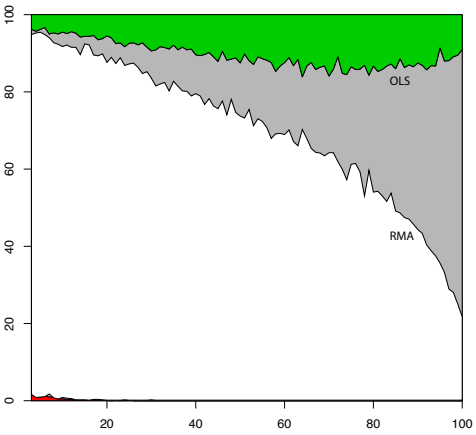

Variable 17: Slope = 0.996

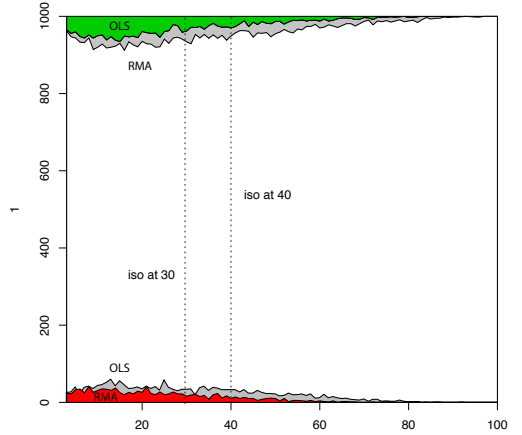

Variable 14: Slope = 0.991

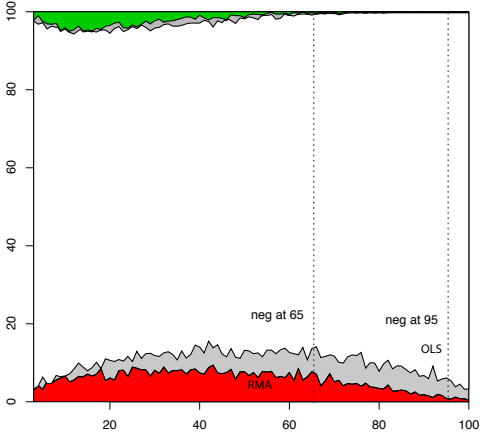

Variable 5: Slope = 0.945

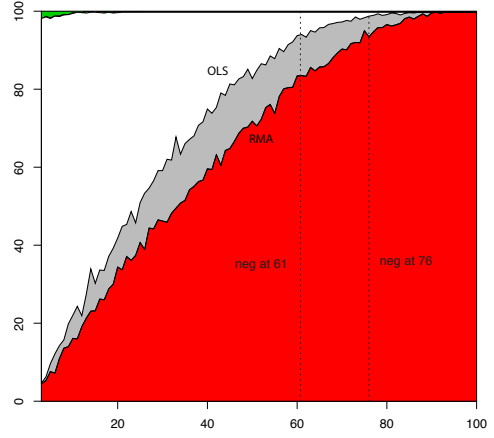

Variable 12: Slope = 0.969

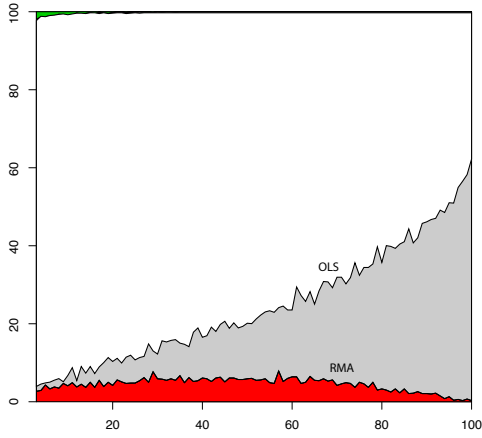

Variable 13: Slope = 0.916

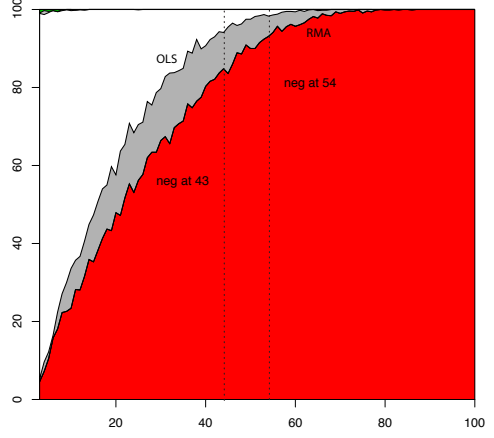

Variable 22: Slope = 0.959

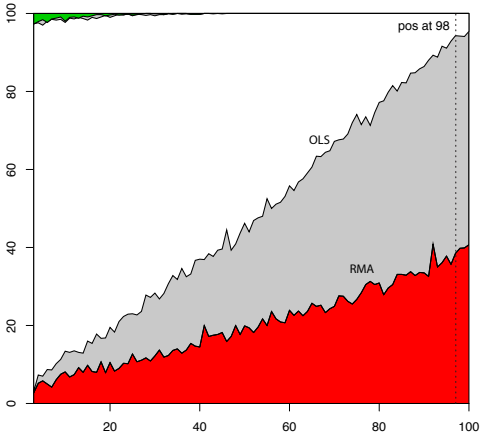

Variable 15: Slope = 0.748

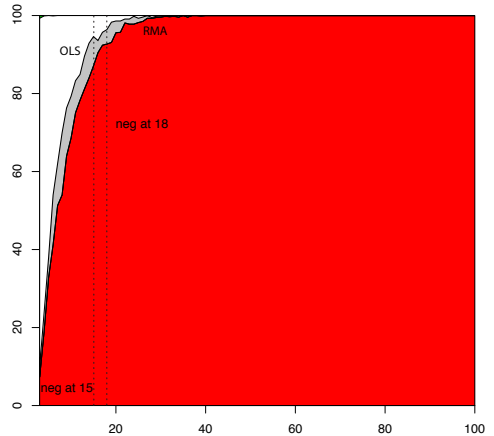

Variable 9: Slope = 0.737

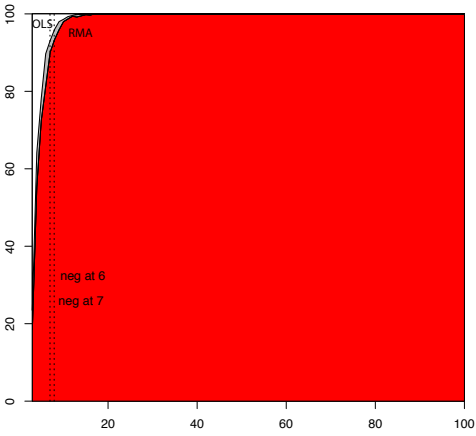

Variable 10: Slope = 0.666

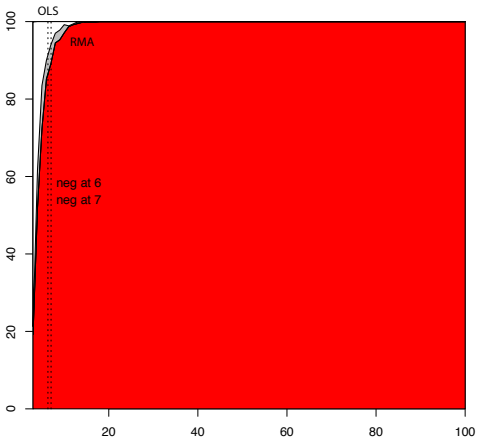

Variable 23: Slope = 0.651

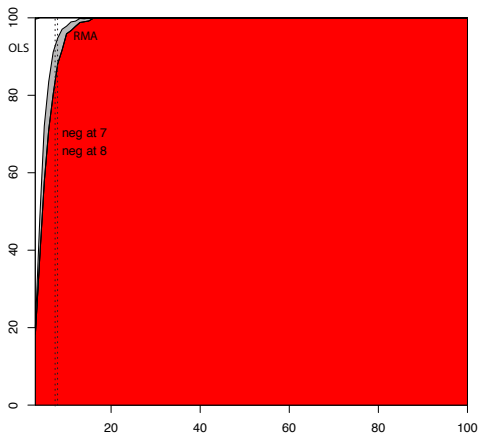

Supplement: Supp_Figure2.pdf [file Supp_Figure2.pdf]
