# Supplementary material for: Small sample sizes in the study of ontogenetic allometry; implications for palaeobiology
Source: PeerJ. 2015 Mar 10;3:e818. doi: 10.7717/peerj.818 (PMC4358694; doi:10.7717/peerj.818)
Supplement: Table S1 — Each sample includes the literature reference, genus and species, whether it is invertebrate or vertebrate and extinct or extant, and the sample size (N). [file peerj-03-818-s003.xls]

## Sheet: Datasets4.csv
Supplementary Table 1: Dataset with the results of a literature survey investigating the sample sizes used in intraspecies allometric studies. Each sample includes the literature reference, genus and species, whether it is invertebrate or vertebrate and extinct or extant, and the sample size (N).
Referance	Genus and Species	Group	Status	Sample Size
Baker and Wilkinson, 2001	Chaetodiopsis meigenii	Invertebrate	Extant	40
Baker and Wilkinson, 2001	Cyrtodiopsis dalmanni	Invertebrate	Extant	93
Baker and Wilkinson, 2001	Cyrtodiopsis quinqueguttata	Invertebrate	Extant	102
Baker and Wilkinson, 2001	Cyrtodiopsis whitei	Invertebrate	Extant	86
Baker and Wilkinson, 2001	Diasemopsis aethiopica	Invertebrate	Extant	104
Baker and Wilkinson, 2001	Diasemopsis albifacies	Invertebrate	Extant	63
Baker and Wilkinson, 2001	Diasemopsis conjuncta	Invertebrate	Extant	65
Baker and Wilkinson, 2001	Diasemopsis dubia	Invertebrate	Extant	128
Baker and Wilkinson, 2001	Diasemopsis elongata	Invertebrate	Extant	30
Baker and Wilkinson, 2001	Diasemopsis fasciata	Invertebrate	Extant	63
Baker and Wilkinson, 2001	Diasemopsis hirsuta	Invertebrate	Extant	67
Baker and Wilkinson, 2001	Diasemopsis longipedunculata	Invertebrate	Extant	74
Baker and Wilkinson, 2001	Diasemopsis nebulosa	Invertebrate	Extant	66
Baker and Wilkinson, 2001	Diasemopsis obstans	Invertebrate	Extant	124
Baker and Wilkinson, 2001	Diasemopsis signata	Invertebrate	Extant	65
Baker and Wilkinson, 2001	Diasemopsis ilvatica	Invertebrate	Extant	82
Baker and Wilkinson, 2001	Diasemopsis sp.	Invertebrate	Extant	21
Baker and Wilkinson, 2001	Diopsis apicalis	Invertebrate	Extant	31
Baker and Wilkinson, 2001	Diopsis fumipennis	Invertebrate	Extant	25
Baker and Wilkinson, 2001	Diopsis gnu	Invertebrate	Extant	7
Baker and Wilkinson, 2001	Eurydiopsis argentifera	Invertebrate	Extant	6
Baker and Wilkinson, 2001	Sphyracephala beccarii	Invertebrate	Extant	99
Baker and Wilkinson, 2001	Sphyracephala brevicornis	Invertebrate	Extant	32
Baker and Wilkinson, 2001	Sphyracephala bipunctipennis	Invertebrate	Extant	23
Baker and Wilkinson, 2001	Sphyracephala munroi	Invertebrate	Extant	45
Baker and Wilkinson, 2001	Teleopsis breviscopium	Invertebrate	Extant	60
Baker and Wilkinson, 2001	Teleopsis quadriguttata	Invertebrate	Extant	29
Baker and Wilkinson, 2001	Teleopsis rubicunda	Invertebrate	Extant	89
Baker and Wilkinson, 2001	Teloglabrus entabenensis	Invertebrate	Extant	18
Baker and Wilkinson, 2001	Trichodiopsis minuta	Invertebrate	Extant	41
Baker and Wilkinson, 2001	Chaetodiopsis meigenii	Invertebrate	Extant	27
Baker and Wilkinson, 2001	Cyrtodiopsis dalmanni	Invertebrate	Extant	91
Baker and Wilkinson, 2001	Cyrtodiopsis quinqueguttata	Invertebrate	Extant	66
Baker and Wilkinson, 2001	Cyrtodiopsis whitei	Invertebrate	Extant	86
Baker and Wilkinson, 2001	Diasemopsis aethiopica	Invertebrate	Extant	93
Baker and Wilkinson, 2001	Diasemopsis albifacies	Invertebrate	Extant	67
Baker and Wilkinson, 2001	Diasemopsis conjuncta	Invertebrate	Extant	65
Baker and Wilkinson, 2001	Diasemopsis dubia	Invertebrate	Extant	107
Baker and Wilkinson, 2001	Diasemopsis elongata	Invertebrate	Extant	29
Baker and Wilkinson, 2001	Diasemopsis fasciata	Invertebrate	Extant	63
Baker and Wilkinson, 2001	Diasemopsis hirsuta	Invertebrate	Extant	67
Baker and Wilkinson, 2001	Diasemopsis longipedunculata	Invertebrate	Extant	50
Baker and Wilkinson, 2001	Diasemopsis nebulosa	Invertebrate	Extant	66
Baker and Wilkinson, 2001	Diasemopsis obstans	Invertebrate	Extant	107
Baker and Wilkinson, 2001	Diasemopsis signata	Invertebrate	Extant	63
Baker and Wilkinson, 2001	Diasemopsis ilvatica	Invertebrate	Extant	112
Baker and Wilkinson, 2001	Diasemopsis sp.	Invertebrate	Extant	22
Baker and Wilkinson, 2001	Diopsis apicalis	Invertebrate	Extant	31
Baker and Wilkinson, 2001	Diopsis fumipennis	Invertebrate	Extant	21
Baker and Wilkinson, 2001	Diopsis gnu	Invertebrate	Extant	6
Baker and Wilkinson, 2001	Eurydiopsis argentifera	Invertebrate	Extant	9
Baker and Wilkinson, 2001	Sphyracephala beccarii	Invertebrate	Extant	110
Baker and Wilkinson, 2001	Sphyracephala brevicornis	Invertebrate	Extant	33
Baker and Wilkinson, 2001	Sphyracephala bipunctipennis	Invertebrate	Extant	22
Baker and Wilkinson, 2001	Sphyracephala munroi	Invertebrate	Extant	14
Baker and Wilkinson, 2001	Teleopsis breviscopium	Invertebrate	Extant	30
Baker and Wilkinson, 2001	Teleopsis quadriguttata	Invertebrate	Extant	18
Baker and Wilkinson, 2001	Teleopsis rubicunda	Invertebrate	Extant	52
Baker and Wilkinson, 2001	Teloglabrus entabenensis	Invertebrate	Extant	12
Baker and Wilkinson, 2001	Trichodiopsis minuta	Invertebrate	Extant	34
Chaparro, 2008	Ostrea chilensis	Invertebrate	Extant	180
Clayton 1990	Ceistostoma kuwaitense	Invertebrate	Extant	134
Clayton and Snowden, 1991	Ilyoplax stevensi	Invertebrate	Extant	109
Clayton and Snowden, 1991	Ilyoplax stevensi	Invertebrate	Extant	95
Emlen, 1997	Onthophagus acuminatus	Invertebrate	Extant	600
Hale et al., 2004	Aporrectodes	Invertebrate	Extant	241
Hale et al., 2004	Dendrobaena octaedra	Invertebrate	Extant	157
Hale et al., 2004	Octolasion tyrlaeum	Invertebrate	Extant	57
Hale et al., 2004	Lumbricus	Invertebrate	Extant	88
Hall et al., 2006	Portunus pelagicus	Invertebrate	Extant	1287
Hall et al., 2006	Hypothalassia acerba	Invertebrate	Extant	571
Hall et al., 2006	Chaceon bicolor	Invertebrate	Extant	392
Hall et al., 2006	Farfantepenaeus duorarum	Invertebrate	Extant	927
Helluy et al., 1995	Homarus americanus	Invertebrate	Extant	16
Hines, 1982	Cancer magister	Invertebrate	Extant	10
Hines, 1982	Geryon quinquidens	Invertebrate	Extant	17
Hines, 1982	Hemigraphsus nudus	Invertebrate	Extant	20
Hines, 1982	Hemigraphsus oregonensis	Invertebrate	Extant	21
Hines, 1982	Pachygrapsus crassipes	Invertebrate	Extant	19
Hines, 1982	Sesarma reticulatum	Invertebrate	Extant	6
Hines, 1982	Libinia emarginata	Invertebrate	Extant	8
Hines, 1982	Loxorhynchus	Invertebrate	Extant	12
Hines, 1982	Mimulus foliatus	Invertebrate	Extant	11
Hines, 1982	Pugettia producta	Invertebrate	Extant	23
Hines, 1982	Pugettia richii	Invertebrate	Extant	28
Hines, 1982	Scyra acutifrons	Invertebrate	Extant	18
Hines, 1982	Uca minax	Invertebrate	Extant	6
Hines, 1982	Uca pugnax	Invertebrate	Extant	11
Hines, 1982	Callinectes sapidus	Invertebrate	Extant	12
Hines, 1982	Ovalipes ocellatus	Invertebrate	Extant	6
Hines, 1982	Eurypoanopeus depressus	Invertebrate	Extant	13
Hines, 1982	Lophopanopeus leucomanus	Invertebrate	Extant	6
Hines, 1982	Panopeus herbstii	Invertebrate	Extant	20
Hines, 1982	Rhithropanopeus harrisii	Invertebrate	Extant	22
Kapiris, 2007	Aristaeomorpha foliacea	Invertebrate	Extant	1449
Kawano, 2000	Cyclommatus bicolor	Invertebrate	Extant	27
Kawano, 2000	Cyclommatus canaliculatus	Invertebrate	Extant	46
Kawano, 2000	Cyclommatus cupreonitens	Invertebrate	Extant	22
Kawano, 2000	Cyclommatus dehaani	Invertebrate	Extant	26
Kawano, 2000	Cyclommatus elaphus	Invertebrate	Extant	29
Kawano, 2000	Cyclommatus lunifer	Invertebrate	Extant	32
Kawano, 2000	Cyclommatus metalifer	Invertebrate	Extant	33
Kawano, 2000	Cyclommatus montanellus	Invertebrate	Extant	22
Kawano, 2000	Cyclommatus pahanensis	Invertebrate	Extant	32
Kawano, 2000	Cyclommatus simaluensis	Invertebrate	Extant	21
Kawano, 2000	Cyclommatus zuberi	Invertebrate	Extant	50
Kawano, 2000	Neolucanus baladeva	Invertebrate	Extant	20
Kawano, 2000	Neolucanus brevis	Invertebrate	Extant	28
Kawano, 2000	Neolucanus cingulatus	Invertebrate	Extant	26
Kawano, 2000	Neolucanus giganteus	Invertebrate	Extant	25
Kawano, 2000	Neolucanus laticollis	Invertebrate	Extant	20
Kawano, 2000	Neolucanus maximus	Invertebrate	Extant	22
Kawano, 2000	Neolucanus nitidus	Invertebrate	Extant	34
Kawano, 2000	Neolucanus parryi	Invertebrate	Extant	35
Kawano, 2000	Neolucanus perarmatus	Invertebrate	Extant	25
Kawano, 2000	Neolucanus sinicus	Invertebrate	Extant	27
Kawano, 2000	Odontolabis alces	Invertebrate	Extant	114
Kawano, 2000	Odontolabis belicosas	Invertebrate	Extant	33
Kawano, 2000	Odontolabis brookeanus	Invertebrate	Extant	26
Kawano, 2000	Odontolabis castelnaudi	Invertebrate	Extant	65
Kawano, 2000	Odontolabis cuvera	Invertebrate	Extant	130
Kawano, 2000	Odontolabis cypri	Invertebrate	Extant	28
Kawano, 2000	Odontolabis femoralis	Invertebrate	Extant	50
Kawano, 2000	Odontolabis gazella	Invertebrate	Extant	38
Kawano, 2000	Odontolabis imperialis	Invertebrate	Extant	21
Kawano, 2000	Odontolabis intermedius	Invertebrate	Extant	68
Kawano, 2000	Odontolabis kazuhisai	Invertebrate	Extant	22
Kawano, 2000	Odontolabis lacordairei	Invertebrate	Extant	57
Kawano, 2000	Odontolabis latipennis	Invertebrate	Extant	38
Kawano, 2000	Odontolabis leuthneri	Invertebrate	Extant	30
Kawano, 2000	Odontolabis ludekingi	Invertebrate	Extant	48
Kawano, 2000	Odontolabis micros	Invertebrate	Extant	23
Kawano, 2000	Odontolabis mouhoti	Invertebrate	Extant	46
Kawano, 2000	Odontolabis platynota	Invertebrate	Extant	48
Kawano, 2000	Odontolabis siva	Invertebrate	Extant	40
Kawano, 2000	Odontolabis sommeri	Invertebrate	Extant	73
Kawano, 2000	Odontolabis spectabilis	Invertebrate	Extant	22
Kawano, 2000	Odontolabis stevensi	Invertebrate	Extant	35
Kawano, 2000	Odontolabis vollenhoveni	Invertebrate	Extant	21
Kawano, 2000	Odontolabis wallastoni	Invertebrate	Extant	48
Kemp and Bertness, 1984	Littorina littorea	Invertebrate	Extant	36
Kemp and Bertness, 1984	Littorina littorea	Invertebrate	Extant	22
Kemp and Bertness, 1984	Littorina littorea	Invertebrate	Extant	80
Kemp and Bertness, 1984	Littorina littorea	Invertebrate	Extant	54
Kemp and Bertness, 1984	Littorina littorea	Invertebrate	Extant	200
Klingenberg and Zimmermann, 1992	Gerris argentatus	Invertebrate	Extant	20
Klingenberg and Zimmermann, 1992	Gerris argentatus	Invertebrate	Extant	20
Klingenberg and Zimmermann, 1992	G. costae	Invertebrate	Extant	20
Klingenberg and Zimmermann, 1992	G. costae	Invertebrate	Extant	20
Klingenberg and Zimmermann, 1992	G. gibbifer	Invertebrate	Extant	20
Klingenberg and Zimmermann, 1992	G. gibbifer	Invertebrate	Extant	20
Klingenberg and Zimmermann, 1992	G. lacustris	Invertebrate	Extant	20
Klingenberg and Zimmermann, 1992	G. lacustris	Invertebrate	Extant	20
Klingenberg and Zimmermann, 1992	G. lateralis	Invertebrate	Extant	20
Klingenberg and Zimmermann, 1992	G. lateralis	Invertebrate	Extant	20
Klingenberg and Zimmermann, 1992	G. odontogaster	Invertebrate	Extant	20
Klingenberg and Zimmermann, 1992	G. odontogaster	Invertebrate	Extant	20
Klingenberg and Zimmermann, 1992	G. thoracicus	Invertebrate	Extant	20
Klingenberg and Zimmermann, 1992	G. thoracicus	Invertebrate	Extant	20
Klingenberg and Zimmermann, 1992	Aquarius najas	Invertebrate	Extant	20
Klingenberg and Zimmermann, 1992	Aquarius najas	Invertebrate	Extant	20
Klingenberg and Zimmermann, 1992	A. paludum	Invertebrate	Extant	20
Klingenberg and Zimmermann, 1992	A. paludum	Invertebrate	Extant	20
Lagergren et al., 2007	Bosmin gibbera	Invertebrate	Extant	50
Lagergren et al., 2007	Daphnia cucullata	Invertebrate	Extant	50
Lagergren et al., 2007	Bosmina retro-extensa	Invertebrate	Extant	30
Lagergren et al., 2007	Leptodora kindtii	Invertebrate	Extant	150
Mooi and David, 1993	Urechinus mortenseni	Invertebrate	Extant	23
Mooi and David, 1993	Urechinus mortenseni	Invertebrate	Extant	16
Tzeng and Yeh, 2001	Penaeus japonicus	Invertebrate	Extant	101
Tzeng and Yeh, 2001	Penaeus japonicus	Invertebrate	Extant	122
Tzeng and Yeh, 2001	Penaeus japonicus	Invertebrate	Extant	54
Tzeng and Yeh, 2001	Penaeus japonicus	Invertebrate	Extant	79
Tzeng and Yeh, 2001	Penaeus japonicus	Invertebrate	Extant	38
Tzeng and Yeh, 2001	Penaeus japonicus	Invertebrate	Extant	44
Tzeng and Yeh, 2001	Penaeus japonicus	Invertebrate	Extant	59
Tzeng and Yeh, 2001	Penaeus japonicus	Invertebrate	Extant	58
Tzeng and Yeh, 2001	Penaeus japonicus	Invertebrate	Extant	102
Tzeng and Yeh, 2001	Penaeus japonicus	Invertebrate	Extant	66
Brower and Veinus, 1975	Hybocrinus punctatus	Invertebrate	Extinct	33
Brower, 1973	Glycymeris parilis	Invertebrate	Extinct	22
Brower, 1987	Comannthus bennetti	Invertebrate	Extinct	24
Brower, 1987	Halysiocrinus tunicatus	Invertebrate	Extinct	16
Brower, 1987	Halysiocrinus dactylus	Invertebrate	Extinct	17
Brower, 1987	Halysiocrinus laticardinalis	Invertebrate	Extinct	12
Brower, 1987	Cremacrinus ramifer	Invertebrate	Extinct	12
Brower, 1988	Cremacrinus ramifer	Invertebrate	Extinct	12
Brower, 1988	Cremacrinus ulrichi	Invertebrate	Extinct	6
Brower, 1988	Paracremacrinus laticardinalis	Invertebrate	Extinct	6
Brower, 1988	Cremacrinus articulosis	Invertebrate	Extinct	5
Brower, 1988	Cremacrinus punctatus	Invertebrate	Extinct	4
Brower, 1990	Eohalysiorinus typus	Invertebrate	Extinct	32
Brower, 2006	Euptychocrinus skopaios	Invertebrate	Extinct	11
Brower, 2006	Cincinnaticrinus varibrachialus	Invertebrate	Extinct	34
Brower, 2006	Ectenocrinus simplex	Invertebrate	Extinct	40
Brower, 2006	Cupulocrinus levorsoni	Invertebrate	Extinct	11
Brower, 2006	Praecupulocrinus conjugans	Invertebrate	Extinct	10
Brower, 2006	Eoparisocrinus crossmani	Invertebrate	Extinct	12
Brower, 2006	Cupulocrinus crossmani	Invertebrate	Extinct	19
Brower, 2006	Paracremacrinus laticardinalis	Invertebrate	Extinct	8
Brower, 2006	Cremacrinus ramifer	Invertebrate	Extinct	12
Brower, 2006	Euptychocrinus skopaios	Invertebrate	Extinct	11
Brower, 2006	Cincinnaticrinus varibrachialus	Invertebrate	Extinct	34
Brower, 2006	Ectenocrinus simplex	Invertebrate	Extinct	27
Brower, 2006	Ectenocrinus simplex	Invertebrate	Extinct	13
Brower, 2006	Cupulocrinus levorsoni	Invertebrate	Extinct	11
Brower, 2006	Praecupulocrinus conjugans	Invertebrate	Extinct	10
Brower, 2006	Eoparisocrinus crossmani	Invertebrate	Extinct	12
Brower, 2006	Cupulocrinus crossmani	Invertebrate	Extinct	19
Brower, 2006	Paracremacrinus laticardinalis	Invertebrate	Extinct	8
Brower, 2006	Cremacrinus ramifer	Invertebrate	Extinct	12
Brower, 2006	Cincinnaticrinus varibrachialus	Invertebrate	Extinct	34
Brower, 2006	Paracremacrinus laticardinalis	Invertebrate	Extinct	8
Brower, 2006	Cremacrinus ramifer	Invertebrate	Extinct	12
Chatterton et al., 1994	Cryptolithus tesselatus	Invertebrate	Extinct	130
Chatterton et al., 1994	Cryptolithus tesselatus	Invertebrate	Extinct	54
Gould, 1966	Poecilozonites nelsoni	Invertebrate	Extinct	22
Gould, 1966	Poecilozonites bermudensis	Invertebrate	Extinct	33
Gould, 1966	Poecilozonites cupula	Invertebrate	Extinct	27
Gould, 1966	Poecilozonites dalli	Invertebrate	Extinct	15
Hopskins and Webster, 2009	Zacanthopis palmeri	Invertebrate	Extinct	184
Jones and Gould, 1999	Gryphaea dilatata	Invertebrate	Extinct	17
Jones and Gould, 1999	Gryphaea dilatata	Invertebrate	Extinct	24
Jones and Gould, 1999	Gryphaea dilatata	Invertebrate	Extinct	25
Jones and Gould, 1999	Gryphaea dilatata	Invertebrate	Extinct	13
Jones and Gould, 1999	Gryphaea dilatata	Invertebrate	Extinct	21
Jones and Gould, 1999	Gryphaea lituola	Invertebrate	Extinct	28
Jones and Gould, 1999	Gryphaea lituola	Invertebrate	Extinct	26
Jones and Gould, 1999	Gryphaea lituola	Invertebrate	Extinct	11
Jones and Gould, 1999	Gryphaea lituola	Invertebrate	Extinct	20
Jones and Gould, 1999	Gryphaea dilobotes	Invertebrate	Extinct	26
Jones and Gould, 1999	Gryphaea dilobotes	Invertebrate	Extinct	19
Jones and Gould, 1999	Gryphaea gigantea	Invertebrate	Extinct	16
Jones and Gould, 1999	Gryphaea gigantea	Invertebrate	Extinct	3
Jones and Gould, 1999	Gryphaea gigantea	Invertebrate	Extinct	10
Jones and Gould, 1999	Gryphaea mccullochi	Invertebrate	Extinct	19
Jones and Gould, 1999	Gryphaea mccullochi	Invertebrate	Extinct	13
Jones and Gould, 1999	Gryphaea mccullochi	Invertebrate	Extinct	4
Jones and Gould, 1999	Gryphaea mccullochi	Invertebrate	Extinct	15
Jones and Gould, 1999	Gryphaea mccullochi	Invertebrate	Extinct	27
Jones and Gould, 1999	Gryphaea mccullochi	Invertebrate	Extinct	20
Jones and Gould, 1999	Gryphaea arcuata	Invertebrate	Extinct	28
Jones and Gould, 1999	Gryphaea arcuata	Invertebrate	Extinct	21
Jones and Gould, 1999	Gryphaea arcuata	Invertebrate	Extinct	25
Jones and Gould, 1999	Gryphaea arcuata	Invertebrate	Extinct	26
Jones and Gould, 1999	Gryphaea arcuata	Invertebrate	Extinct	26
Jones and Gould, 1999	Gryphaea arcuata	Invertebrate	Extinct	29
Jones and Gould, 1999	Gryphaea arcuata	Invertebrate	Extinct	30
Jones and Gould, 1999	Gryphaea arcuata	Invertebrate	Extinct	26
Jones and Gould, 1999	Gryphaea arcuata	Invertebrate	Extinct	28
McKinney, 1984	Oligopygus phelani	Invertebrate	Extinct	226
McKinney, 1984	Oligopygus haldemani	Invertebrate	Extinct	733
McKinney, 1984	Oligopygus wetherbyi	Invertebrate	Extinct	131
O'Brien and Caron, 2012	Syphusauctum gergarium	Invertebrate	Extinct	210
Scott, 1973	Globorotalia menardii	Invertebrate	Extinct	18
Scott, 1973	Globorotalia menardii	Invertebrate	Extinct	25
Scott, 1973	Globorotalia menardii	Invertebrate	Extinct	26
Spight, 1973	Thais lamellosa	Invertebrate	Extinct	19
Spight, 1973	Thais lamellosa	Invertebrate	Extinct	17
Spight, 1973	Thais lamellosa	Invertebrate	Extinct	8
Spight, 1973	Thais lamellosa	Invertebrate	Extinct	9
Spight, 1973	Thais lamellosa	Invertebrate	Extinct	41
Spight, 1973	Thais lamellosa	Invertebrate	Extinct	27
Spight, 1973	Thais lamellosa	Invertebrate	Extinct	10
Spight, 1973	Thais lamellosa	Invertebrate	Extinct	22
Spight, 1973	Thais lamellosa	Invertebrate	Extinct	10
Spight, 1973	Thais lamellosa	Invertebrate	Extinct	13
Spight, 1973	Thais lamellosa	Invertebrate	Extinct	9
Spight, 1973	Thais lamellosa	Invertebrate	Extinct	20
Spight, 1973	Thais lamellosa	Invertebrate	Extinct	11
Spight, 1973	Thais lamellosa	Invertebrate	Extinct	7
Spight, 1973	Thais lamellosa	Invertebrate	Extinct	13
Spight, 1973	Thais lamellosa	Invertebrate	Extinct	10
Spight, 1973	Thais lamellosa	Invertebrate	Extinct	10
Spight, 1973	Thais lamellosa	Invertebrate	Extinct	60
Spight, 1973	Thais lamellosa	Invertebrate	Extinct	11
Spight, 1973	Thais lamellosa	Invertebrate	Extinct	10
Spight, 1973	Thais lamellosa	Invertebrate	Extinct	13
Spight, 1973	Thais lamellosa	Invertebrate	Extinct	17
Spight, 1973	Thais lamellosa	Invertebrate	Extinct	18
Spight, 1973	Thais canaliculata	Invertebrate	Extinct	8
Spight, 1973	Thais canaliculata	Invertebrate	Extinct	15
Spight, 1973	Thais canaliculata	Invertebrate	Extinct	10
Spight, 1973	Thais emaginata	Invertebrate	Extinct	10
Spight, 1973	Thais emaginata	Invertebrate	Extinct	15
Spight, 1973	Thais emaginata	Invertebrate	Extinct	11
Spight, 1973	Thais emaginata	Invertebrate	Extinct	12
Spight, 1973	Thais lamellosa	Invertebrate	Extinct	264
Tsujino et al., 2003	Baculites tanakae	Invertebrate	Extinct	35
Tsujino et al., 2004	Baculites tanakae	Invertebrate	Extinct	23
Waters et al., 1985	Pentremites pyriformis	Invertebrate	Extinct	40
Waters et al., 1985	Pentremites conoideus	Invertebrate	Extinct	94
Waters et al., 1985	Pentremites robustus	Invertebrate	Extinct	87
Webster, 2007	Nephrolenellus multinodus	Invertebrate	Extinct	254
Webster, 2007	Nephrolenellus geniculatus	Invertebrate	Extinct	367
Wei., 1994	Globoconella inflata	Invertebrate	Extinct	36
Wei., 1994	Globoconella subconomiozea	Invertebrate	Extinct	33
Wei., 1994	Globoconella puncticulata	Invertebrate	Extinct	30
âoban et al., 2009	Sparus aurata	Vertebrate	Extant	784
Bergmann abd Motta, 2005	Cichlasoma urophthalmus	Vertebrate	Extant	204
Bergmann abd Motta, 2005	Mus musculus	Vertebrate	Extant	57
Bergmann abd Motta, 2005	Mus musculus	Vertebrate	Extant	57
Bergmann abd Motta, 2005	Mus musculus	Vertebrate	Extant	41
Bergmann abd Motta, 2005	Mus musculus	Vertebrate	Extant	42
Bergmann abd Motta, 2005	Mus musculus	Vertebrate	Extant	56
Bergmann abd Motta, 2005	Mus musculus	Vertebrate	Extant	29
Bergmann abd Motta, 2005	Mus musculus	Vertebrate	Extant	282
Blob, 2006	Larus californicus	Vertebrate	Extant	23
Blob, 2006	Larus californicus	Vertebrate	Extant	23
Blob, 2006	Larus californicus	Vertebrate	Extant	22
Blob, 2006	Lepus californicus	Vertebrate	Extant	49
Blob, 2006	Lepus californicus	Vertebrate	Extant	51
Blob, 2006	Lepus californicus	Vertebrate	Extant	20
Cardini and O'Higgins, 2005	Marmota caligata	Vertebrate	Extant	64
Cardini and O'Higgins, 2005	Marmota caudata	Vertebrate	Extant	47
Cardini and O'Higgins, 2005	Marmota flaviventris	Vertebrate	Extant	80
Cardini and O'Higgins, 2005	Marmota himalayana	Vertebrate	Extant	55
Cardini and O'Higgins, 2005	Marmota marmota	Vertebrate	Extant	67
Cardini and O'Higgins, 2005	Marmota monax	Vertebrate	Extant	73
Cassemiro et al., 2007	Satanoperca pappaterra	Vertebrate	Extant	258
Corruccini and McHenry, 1978	Homo sapiens	Vertebrate	Extant	57
Devillers et al., 1993	Equus caballus prjewalski	Vertebrate	Extant	13
Devillers et al., 1993	Equus caballas (domestic)	Vertebrate	Extant	44
Devillers et al., 1993	Ponies	Vertebrate	Extant	7
Devillers et al., 1993	Equus quagga	Vertebrate	Extant	31
Devillers et al., 1993	Equus hemionus	Vertebrate	Extant	35
Devillers et al., 1993	Equus zebra	Vertebrate	Extant	17
Dodson, 1975	Aligator mississippiensis	Vertebrate	Extant	52
Dodson, 1975	Casuarius casuarius	Vertebrate	Extant	43
Dodson, 1975	Sceloporus olivaceous	Vertebrate	Extant	80
Dodson, 1975	Sceloporus undulatus	Vertebrate	Extant	69
Flores et al., 2003	Lutreolina crassicaudata	Vertebrate	Extant	43
Flores et al., 2006	Dasyurus albopunctatus	Vertebrate	Extant	31
Garland, 1985	Amphibolurus nuchalis	Vertebrate	Extant	68
Gisbert, 1999	Acipenser baeri	Vertebrate	Extant	143
Gomez, 1991	Loris tardigradus	Vertebrate	Extant	24
Gomez, 1991	Nycticebus pygmaeus	Vertebrate	Extant	10
Gomez, 1991	Arctocebus calabarensis	Vertebrate	Extant	30
Gomez, 1991	Nyctucebus coucang	Vertebrate	Extant	24
Gomez, 1991	Perodicticus potto	Vertebrate	Extant	33
Graed et al., 2010	Sander vitreus	Vertebrate	Extant	20
Graed et al., 2010	Perca flavescens	Vertebrate	Extant	56
Hellig et al., 2010	Lepidiolamprologus elongatus	Vertebrate	Extant	40
Hernandez and Motta, 1997	Archosargus probatocephalus	Vertebrate	Extant	190
Hills et al., 1983	Homo sapiens	Vertebrate	Extant	131
Hills et al., 1983	Gorilla	Vertebrate	Extant	25
Hills et al., 1983	Pongo	Vertebrate	Extant	24
Holliday and Franciscus, 2012	Homo sapiens	Vertebrate	Extant	894
Holliday and Franciscus, 2012	Pan troglodytes	Vertebrate	Extant	35
Holliday and Franciscus, 2012	Gorilla gorilla	Vertebrate	Extant	36
Ismen et al., 2006	Rhinobatos rhinobatos	Vertebrate	Extant	225
Kaplan and Salthe, 1979	Amblystoma tigrinum	Vertebrate	Extant	15
Kaplan and Salthe, 1979	Amblystoma maculatum	Vertebrate	Extant	48
Kaplan and Salthe, 1979	Amblystoma opacum	Vertebrate	Extant	22
Kaplan and Salthe, 1979	Amblystoma opacum	Vertebrate	Extant	14
Kieser and Groeneveld, 1988	Homo sapiens	Vertebrate	Extant	100
Koumoundours et al., 1999	Dentex dentex	Vertebrate	Extant	368
Koumoundours et al., 1999	Dentex dentex	Vertebrate	Extant	398
Kowalewski et al., 1996	Glottidia albida	Vertebrate	Extant	11
Kowalewski et al., 1996	Glottidia audebarti	Vertebrate	Extant	27
Kowalewski et al., 1996	Glottidia palmeri	Vertebrate	Extant	83
Kowalewski et al., 1996	Glottidia pyramidata	Vertebrate	Extant	30
KurtŽn, 1955	Ursus arctos	Vertebrate	Extant	151
Larson, 2003	Bufo americanus	Vertebrate	Extant	105
Leamy and Bradley	Mus musculus	Vertebrate	Extant	383
Leutenegger and Masterson, 1989	Pongo pygmaeus	Vertebrate	Extant	212
Livezey, 1989	Pelucunoides urinutor	Vertebrate	Extant	60
Livezey, 1989	Aptenodvtes forsteri	Vertebrate	Extant	49
Livezey, 1989	Pygoscelis udeliae	Vertebrate	Extant	39
Livezey, 1989	Eudyptus chrysocome	Vertebrate	Extant	63
Livezey, 1989	Megadyptes antipodes	Vertebrate	Extant	45
Livezey, 1989	Eudyptula minor	Vertebrate	Extant	42
Livezey, 1989	Spheniscus mugellanicus	Vertebrate	Extant	63
Lnouye, 1991	Pan troglodytes	Vertebrate	Extant	107
Lnouye, 1991	Gorilla gorilla	Vertebrate	Extant	103
Lnouye, 1991	Pan paniscus	Vertebrate	Extant	29
Lnouye, 1991	Gorilla gorilla beringei	Vertebrate	Extant	23
Lnouye, 1991	Pan pygmaeus	Vertebrate	Extant	38
Loponte et al., 2010	Pterodoras granulosua	Vertebrate	Extant	28
Luque et al., 2007	Arctocephalus gazilla	Vertebrate	Extant	153
Luque et al., 2007	Arctocephalus tropicalis	Vertebrate	Extant	124
Miller et al., 2009	Ursus americanus	Vertebrate	Extant	429
Miller et al., 2009	Ursus americanus	Vertebrate	Extant	502
Piacentino and y Barrera Oro	Trematomus newnesi	Vertebrate	Extant	180
Pounds et al., 1983	Dipsosaurus dorslis	Vertebrate	Extant	132
Pounds et al., 1983	Uta stansburiana	Vertebrate	Extant	124
Pounds et al., 1983	Callisaurus draconoides	Vertebrate	Extant	116
Pounds et al., 1983	Cophosaurus taxanus	Vertebrate	Extant	128
Pounds et al., 1983	Sceloporus woodi	Vertebrate	Extant	159
Ravosa and Daniel, 2010	Propithecus verreauxi	Vertebrate	Extant	74
Ravosa and Daniel, 2010	Propithecus diadema	Vertebrate	Extant	36
Ravosa and Daniel, 2010	Avahi laniger	Vertebrate	Extant	26
Ravosa and Daniel, 2010	Indri indri	Vertebrate	Extant	26
Ravosa and Daniel, 2010	Eulemur fulvus	Vertebrate	Extant	70
Ravosa and Daniel, 2010	Eulemur macaco	Vertebrate	Extant	24
Ravosa and Daniel, 2010	Eulemur mongoz	Vertebrate	Extant	29
Ravosa and Daniel, 2010	Eulemur rubriventer	Vertebrate	Extant	26
Ravosa and Daniel, 2010	Lemur catta	Vertebrate	Extant	44
Ravosa and Daniel, 2010	Varecia variegata	Vertebrate	Extant	43
Ravosa and Daniel, 2010	Hapallemur griseus	Vertebrate	Extant	61
Shea, 1985	Pan paniscus	Vertebrate	Extant	120
Shea, 1985	Pan troglodytes	Vertebrate	Extant	124
Shea, 1985	Gorilla gorilla	Vertebrate	Extant	135
Weston and Lister, 2009	Hippopotomus amphibius	Vertebrate	Extant	33
Weston and Lister, 2009	Hippopotomus lemerlei	Vertebrate	Extant	12
Weston and Lister, 2009	Hippopotomus madagascariensis	Vertebrate	Extant	12
Weston, 2005	Hippopotamus amphibius	Vertebrate	Extant	16
Wolpoff, 1981	Gorilla gorilla	Vertebrate	Extant	210
Wolpoff, 1981	Gorilla gorilla	Vertebrate	Extant	108
Wolpoff, 1981	Pan	Vertebrate	Extant	81
Wolpoff, 1981	Pan	Vertebrate	Extant	84
Wolpoff, 1981	Pongo	Vertebrate	Extant	51
Wolpoff, 1981	Pongo	Vertebrate	Extant	51
Wood and Wilso, 1986	Homo sapiens	Vertebrate	Extant	70
Wood et al., 1991	Homo sapiens	Vertebrate	Extant	75
Wood et al., 1991	Gorilla gorilla	Vertebrate	Extant	64
Wood et al., 1991	Pan troglodytes	Vertebrate	Extant	51
Wood et al., 1991	Pan pygmaeus	Vertebrate	Extant	43
Wood, 1979	Gorilla gorilla	Vertebrate	Extant	20
Wood, 1979	Gorilla gorilla	Vertebrate	Extant	17
Wood, 1979	Pan	Vertebrate	Extant	13
Wood, 1979	Pan	Vertebrate	Extant	22
Wotherspoon and Burgin, 2010	Pogona barata	Vertebrate	Extant	197
Written, 1985	Tympanocryptis cephalus	Vertebrate	Extant	12
Written, 1985	Tympanocryptis intirna	Vertebrate	Extant	12
Written, 1985	Tympanocryptis tetraporophora	Vertebrate	Extant	17
Written, 1985	Tympanocryptis adelaidensis	Vertebrate	Extant	16
Written, 1985	Tympanocryptis diemensis	Vertebrate	Extant	49
Written, 1985	Arnphibolurus rnuricafus	Vertebrate	Extant	65
Written, 1985	Arnphibolurus nobbi	Vertebrate	Extant	147
Written, 1985	Cairnanops amphiboluroides	Vertebrate	Extant	22
Written, 1985	Chlamydosaurus kingii	Vertebrate	Extant	14
Written, 1985	Diporiphora albilabris	Vertebrate	Extant	14
Written, 1985	Diporiphora australis	Vertebrate	Extant	15
Written, 1985	Diporiphora bennettii	Vertebrate	Extant	14
Written, 1985	Diporiphora bilineata	Vertebrate	Extant	29
Written, 1985	Diporiphora lalliae	Vertebrate	Extant	10
Written, 1985	Diporiphora magna	Vertebrate	Extant	14
Written, 1985	Diporiphora winneckei	Vertebrate	Extant	13
Written, 1985	Lophognathus gilberti gilberti	Vertebrate	Extant	14
Written, 1985	Lophognathus g. centralis	Vertebrate	Extant	61
Written, 1985	Lophognathus longirostris	Vertebrate	Extant	12
Written, 1985	Lophognathus ternporalis	Vertebrate	Extant	12
Written, 1985	Ctenophorus decresii	Vertebrate	Extant	14
Written, 1985	Ctenophorus fionni	Vertebrate	Extant	19
Written, 1985	Ctenophorus ornatus	Vertebrate	Extant	10
Written, 1985	Ctenophorus pictus	Vertebrate	Extant	23
Written, 1985	Ctenophorus fordi	Vertebrate	Extant	31
Written, 1985	Ctenophorus isolepis	Vertebrate	Extant	62
Written, 1985	Ctenophorus cristatus	Vertebrate	Extant	18
Written, 1985	Ctenophorus caudicinctus	Vertebrate	Extant	31
Written, 1985	Ctenophorus reticulatus	Vertebrate	Extant	20
Written, 1985	Ctenophorus gibba	Vertebrate	Extant	17
Written, 1985	Ctenophorus maculosus	Vertebrate	Extant	28
Written, 1985	Ctenophorus nuchalis	Vertebrate	Extant	52
Written, 1985	Pogona barbata	Vertebrate	Extant	21
Written, 1985	Pogona vitticeps	Vertebrate	Extant	16
Written, 1985	Moloch horridus	Vertebrate	Extant	12
Written, 1985	Phjaignathus lesueurii	Vertebrate	Extant	14
Written, 1985	Chelosania brunnea	Vertebrate	Extant	6
Yezerinac et al., 1992	Passerculus sandwichensis	Vertebrate	Extant	20
Yezerinac et al., 1992	Passer domesticus	Vertebrate	Extant	25
Yezerinac et al., 1992	Acridotheres tristis	Vertebrate	Extant	25
Yezerinac et al., 1992	Empidonax ainorum	Vertebrate	Extant	19
Yezerinac et al., 1992	Molothrus ater	Vertebrate	Extant	25
Yezerinac et al., 1992	Euphagus cyanocephalus	Vertebrate	Extant	23
Yezerinac et al., 1992	Zonotrichia capensis	Vertebrate	Extant	21
Bennet, 1995	Rhamphorhynchus muensteri	Vertebrate	Extinct	40
Bennet, 1995	Rhamphorhynchus muensteri	Vertebrate	Extinct	23
Benton and Kirkpatrick, 1989	Scaphonyx fisheri	Vertebrate	Extinct	13
Black et al., 2001	Nimbadon lavarackorum	Vertebrate	Extinct	26
Campione and Evans., 2011	Edmontosaurus regalis	Vertebrate	Extinct	9
Campione and Evans., 2011	Edmontosaurus annectans	Vertebrate	Extinct	14
Campman et al., 1981	Stegoceras validum	Vertebrate	Extinct	29
Cavalcanti, 2002	Mesosaurus tenuidens	Vertebrate	Extinct	37
Cavalcanti, 2002	Stereosternum tumidum	Vertebrate	Extinct	13
Cavalcanti, 2002	Brazilosaurus sanpauloensis	Vertebrate	Extinct	4
Currie and Carroll, 1984	Thadeosaurus colcanapi	Vertebrate	Extinct	14
Devillers et al., 1984	Mesohippus	Vertebrate	Extinct	19
Devillers et al., 1984	Miohippus	Vertebrate	Extinct	6
Devillers et al., 1984	Parahippus	Vertebrate	Extinct	7
Devillers et al., 1984	Merychippus A	Vertebrate	Extinct	6
Devillers et al., 1984	Merychippus B	Vertebrate	Extinct	54
Devillers et al., 1984	Griphippus	Vertebrate	Extinct	18
Devillers et al., 1984	Cormohipparion	Vertebrate	Extinct	15
Devillers et al., 1984	Pliohippus	Vertebrate	Extinct	14
Devillers et al., 1984	Equus sp. (Alaska)	Vertebrate	Extinct	13
Dodson, 1975	Corythosaurus casuarius	Vertebrate	Extinct	19
Dodson, 1975	Lambeosaurus lambei	Vertebrate	Extinct	13
Dodson, 1975	Lambeosaurus magnacristatus	Vertebrate	Extinct	2
Dodson, 1976	Protoceratops	Vertebrate	Extinct	24
Emerson, 1993	Oryctolagus cuniculus	Vertebrate	Extinct	17
Emerson, 1993	Lepus californicus	Vertebrate	Extinct	18
Evans, 2010	Corythosaurus	Vertebrate	Extinct	18
Evans, 2010	Lamebeosaurus	Vertebrate	Extinct	16
Evans, 2010	Hypacrosaurus	Vertebrate	Extinct	10
Evans, 2010	Hypacrosaurus altispinus	Vertebrate	Extinct	7
Gould, 1973	Megaloceros giganteus	Vertebrate	Extinct	79
Houck et al., 1990	Archaeopteryx lithographica	Vertebrate	Extinct	6
Kilbourne and Makovicky, 2010	Riojasaurus incertus	Vertebrate	Extinct	7
Kilbourne and Makovicky, 2010	Apatosaurus sp.	Vertebrate	Extinct	18
Kilbourne and Makovicky, 2010	Camarasaurus sp.	Vertebrate	Extinct	32
Kilbourne and Makovicky, 2010	Diplodocus sp.	Vertebrate	Extinct	17
Kilbourne and Makovicky, 2010	Miasaura peeblesorum	Vertebrate	Extinct	41
Kilbourne and Makovicky, 2010	Tenontosaurus tilletti	Vertebrate	Extinct	6
Kilbourne and Makovicky, 2010	Kentrosaurus authiopicus	Vertebrate	Extinct	14
Kilbourne and Makovicky, 2010	Centrosaurus apertus	Vertebrate	Extinct	6
Kilbourne and Makovicky, 2010	Allosaurus fragilis	Vertebrate	Extinct	49
Kilbourne and Makovicky, 2010	Tyrannosaurus rex	Vertebrate	Extinct	21
Kilbourne and Makovicky, 2010	Tarbosaurus bataar	Vertebrate	Extinct	5
Kilbourne and Makovicky, 2010	Gorgosaurus libratus	Vertebrate	Extinct	12
Kilbourne and Makovicky, 2010	Daspletosaurus torosus	Vertebrate	Extinct	6
Kilbourne and Makovicky, 2010	Gallimimus bullatus	Vertebrate	Extinct	5
Kilbourne and Makovicky, 2010	Herrerasaurus ischigualastensis	Vertebrate	Extinct	5
Kilbourne and Makovicky, 2010	Troodon formosus	Vertebrate	Extinct	7
Kilbourne and Makovicky, 2010	Massospondylus carinatus	Vertebrate	Extinct	16
Kilbourne and Makovicky, 2010	Riojasaurus incertus	Vertebrate	Extinct	8
Kilbourne and Makovicky, 2010	Apatosaurus sp.	Vertebrate	Extinct	12
Kilbourne and Makovicky, 2010	Camarasaurus sp.	Vertebrate	Extinct	27
Kilbourne and Makovicky, 2010	Diplodocus sp.	Vertebrate	Extinct	23
Kilbourne and Makovicky, 2010	Tenontosaurus tilletti	Vertebrate	Extinct	6
Kilbourne and Makovicky, 2010	Dyosaurus lettowvorbecki	Vertebrate	Extinct	27
Kilbourne and Makovicky, 2010	Hypacrosaurus stebingeri	Vertebrate	Extinct	12
Kilbourne and Makovicky, 2010	Miasaura peeblesorum	Vertebrate	Extinct	23
Kilbourne and Makovicky, 2010	Stegosaurus stenops	Vertebrate	Extinct	6
Kilbourne and Makovicky, 2010	Kentrosaurus aethiopicus	Vertebrate	Extinct	37
Kilbourne and Makovicky, 2010	Pachyrhinosaurus sp.	Vertebrate	Extinct	8
Kilbourne and Makovicky, 2010	Centrosaurus apertus	Vertebrate	Extinct	4
Kilbourne and Makovicky, 2010	Chasmosaurus mariscalensis	Vertebrate	Extinct	21
Kilbourne and Makovicky, 2010	Psittacosaurus lujiatunensis	Vertebrate	Extinct	5
KurtŽn, 1955	Ursus spelaeus	Vertebrate	Extinct	110
Lehman, 1992	Chasmosaurus mariscalensis	Vertebrate	Extinct	7
Lehman, 1992	Chasmosaurus mariscalensis	Vertebrate	Extinct	13
Lehman, 1992	Chasmosaurus mariscalensis	Vertebrate	Extinct	10
Purnell, 1993	Idiognathodus	Vertebrate	Extinct	59
Purnell, 1993	Gnathodus bilineatus	Vertebrate	Extinct	13
Schott et al., 2011	Stegoceras validum	Vertebrate	Extinct	40
Tomknins et al., 2010	Pteranodon longiceps	Vertebrate	Extinct	9
Werdelin and Long, 1986	Bothriolepis canadesis	Vertebrate	Extinct	104
Weston, 2003	Hexaprotodon liberiensis	Vertebrate	Extinct	19
Weston, 2003	Hexaprotodon harvardi	Vertebrate	Extinct	6
Witzmann and Pfretzschner, 2003	Micromelerpeton credneri	Vertebrate	Extinct	32
Witzmann, 2007	Archegosaurus decheni	Vertebrate	Extinct	96
