# Supplementary material for: Small sample sizes in the study of ontogenetic allometry; implications for palaeobiology
Source: PeerJ. 2015 Mar 10;3:e818. doi: 10.7717/peerj.818 (PMC4358694; doi:10.7717/peerj.818)
Supplement: Table S2 — Dataset of 108 specimens of Alligator mississippiensis, as well as their cranial measurements (23) used in this study. Institutional Abbreviations; AM, Australian Museum, Sydney; AMNH, America Museum of Natural History, New York; CMN, Canadian Museum of Nature, Ottawa; FMNH, Field Museum of Natural History, Chicago; TMM, Texas Memorial Museum, Austin; ROM, Royal Ontario Museum, Toronto; RTMP, Royal Tyrrell Museum of Palaeontology, Drumheller; UCMP, University of California Museum of Paleontology, Berkeley; UCMVZ, University of California Museum of Vertebrate Zoology, Berkeley; UCMZ, University of Calgary Museum of Zoology, Calgary; UF, Florida Museum of Natural History, Gainesville; UM, University of Michigan Museum of Zoology, Ann Arbour; USMN; National Museum of Natural History (Smithsonian), Washington. [file peerj-03-818-s004.xls]

## Sheet: Chap3_appendix2.xls
Supplimentary Table 2: Dataset of 108 specimens of Alligator mississippiensis, as well as their cranial measurements (23) used in this study. Institutional Abbreviations; AM, Australian Museum, Sydney; AMNH, America Museum of Natural History, New York; CMN, Canadian Museum of Nature, Ottawa; FMNH, Field Museum of Natural History, Chicago; TMM, Texas Memorial Museum, Austin; ROM, Royal Ontario Mus…
Spec. Number	1	2	3	4	5	6	7	8	9	10	11	12	13	14	15	16	17	18	19	20	21	22	23
UCMP no data	8	10	12	17	14	29	11	10	10	8	2	3	4	13	3	8	13	4	5	2	3	6	4
ROM R 7966	9	13	15	18	16	35	14	10	11	9	3	4	4	19	6	9	15	5	8	3	4	8	4
ROM R 7964	9	12	13	18	15	35	13	10	10	8	2	3	3	17	5	8	13	5	8	3	4	7	4
UCMP 142041	10	13	16	20	15	37	15	10	10	9	2	3	4	21	5	9	14	5	7	3	4	7	3
UCMP 142042	10	15	17	21	15	38	16	11	11	10	2	3	4	20	5	10	14	6	8	3	3	9	4
ROM R 7965	10	15	17	20	17	40	17	11	12	9	4	4	4	22	6	10	16	6	8	4	4	8	5
ROM R 6253	11	16	20	22	17	44	19	12	13	10	3	4	4	23	5	12	17	7	7	3	4	9	4
ROM R 6251	11	16	20	23	16	44	21	13	13	11	3	4	5	23	6	11	16	7	9	3	4	10	4
ROM R 6252	11	16	19	23	17	45	20	12	13	11	3	4	4	23	6	11	16	7	9	3	4	9	4
YPM 908	12	17	20	25	17	45	20	13	12	10	3	4	4	25	6	10	17	7	8	3	5	11	8
AMNH 46843	12	15	19	24	16	46	20	14	13	12	3	4	5	35	9	12	14	7	10	4	6	20	8
AMNH 67134	18	24	29	31	21	61	29	16	16	14	4	5	6	33	8	13	22	10	12	5	7	14	5
UCMVZ 222424	17	22	25	30	22	63	30	17	16	13	4	6	6	33	6	14	20	10	13	5	7	15	6
ROM R 0001	18	25	28	33	23	67	34	18	18	14	4	6	6	37	6	17	22	10	13	5	7	15	5
CMNAR 35755	19	25	29	34	25	70	34	20	18	14	5	7	6	37	8	18	24	11	15	5	8	17	6
dissected spec.	20	26	30	36	22	70	34	18	18	14	4	5	6	48	11	18	26	11	15	6	10	25	9
UCMVZ 95933	19	27	34	38	28	84	44	23	19	15	5	7	7	43	7	22	29	13	18	7	9	18	5
CMNAR 35753	22	30	35	45	33	85	42	23	22	16	6	7	7	46	8	22	27	14	19	7	9	18	7
ROM R 0008	25	35	41	47	32	97	51	26	25	16	7	8	9	53	11	23	32	16	18	7	10	20	8
ROM R 936	26	37	44	51	36	102	55	29	24	17	7	9	9	56	10	26	33	17	23	8	14	22	7
ROM R 8352	28	38	45	51	35	107	59	30	27	19	7	10	10	60	12	29	38	18	25	9	12	23	7
ROM R 8349	29	39	45	53	37	111	58	30	27	21	8	9	11	63	11	29	36	18	23	10	13	22	9
ROM R 8350	28	41	48	52	35	113	59	31	27	20	8	10	10	65	12	30	39	18	27	10	13	25	7
ROM R 7852	27	41	45	54	40	115	63	31	25	20	7	10	10	64	11	27	38	18	25	8	14	24	7
UCMVZ 65763	30	43	49	57	39	116	65	33	26	19	10	10	11	66	11	30	40	19	24	9	14	24	8
ROM no data	32	47	54	65	43	120	66	32	27	23	9	12	13	67	12	30	41	21	26	12	16	28	8
CMNAR 35968	32	45	57	77	54	128	64	42	28	23	10	18	16	67	16	36	50	24	20	10	19	36	10
ROM R 8039	39	53	63	69	48	140	74	47	28	23	7	12	12	74	13	32	45	25	32	12	16	34	9
ROM R 7853	36	52	61	74	50	146	80	40	32	26	9	14	14	77	12	38	50	23	31	12	17	32	9
ROM R 8355	40	55	64	73	49	150	82	42	33	23	10	14	14	86	16	41	52	24	34	14	20	32	9
ROM R 8354	37	50	58	64	43	151	76	38	34	24	9	11	11	81	14	32	44	22	28	11	17	29	10
785-1133	31	50	60	81	60	157	83	47	27	26	10	18	18	81	16	34	54	28	25	12	21	36	15
YPM 573	45	58	69	74	48	158	84	41	31	26	12	12	14	88	16	32	53	25	35	15	19	32	11
ROM R 8345	45	64	75	92	63	166	94	49	38	29	13	12	17	97	18	48	62	30	36	15	20	37	11
UCMVZ 129985	41	61	72	87	63	167	93	48	35	25	11	16	13	93	14	45	59	28	36	15	20	35	11
UCMP131080	43	65	76	92	64	172	93	52	35	27	13	17	15	94	15	47	60	31	39	17	24	35	11
AMNH 106269	40	58	71	88	57	172	96	47	36	29	10	18	16	91	17	36	53	28	41	15	23	43	11
ROM Herp 46540	43	62	71	82	57	182	101	50	39	26	14	17	16	97	13	41	53	28	42	14	22	34	10
UCMVZ 200608	47	71	85	95	67	183	102	55	35	30	12	16	15	101	16	50	65	34	43	18	26	40	11
ROM R 4405	54	68	75	91	62	188	106	55	37	26	12	19	16	101	15	44	55	28	39	15	24	39	12
UCMP 131688	50	68	80	97	68	189	100	58	40	28	14	17	16	102	19	49	68	34	43	19	27	43	14
ROM 4414	48	65	76	92	66	199	106	56	39	32	14	24	18	106	18	51	60	31	44	16	23	40	12
ROM R 8335	54	74	86	102	70	204	121	70	37	28	17	18	19	118	17	60	72	35	49	20	26	44	13
ROM R 1698	52	70	81	93	62	205	115	52	44	27	15	16	16	115	17	48	66	33	43	16	23	43	12
AMNH 40581	63	86	106	130	81	218	129	64	40	33	17	18	22	120	22	51	82	39	45	19	31	55	13
USNM 167541 lrg.	65	80	92	107	64	219	123	60	43	30	14	16	19	117	20	48	73	39	48	19	28	47	12
ROM R 5855	59	82	96	110	72	223	122	60	44	30	18	17	19	122	19	59	74	36	43	17	27	46	12
ROM R 8332	60	85	95	116	82	223	137	67	42	30	19	22	20	132	19	63	77	37	55	18	31	51	15
ROM R 4424	56	83	110	136	86	224	121	62	45	29	19	20	20	108	20	66	84	44	46	20	31	51	15
ROM R 4418	56	79	89	107	74	229	128	64	45	28	17	22	18	120	18	58	74	37	49	19	28	46	12
ROM R 4406	67	83	97	118	80	241	137	77	45	32	17	22	18	130	19	65	78	37	52	20	29	51	14
ROM R 8334	68	92	106	128	85	248	153	72	44	33	20	23	22	140	22	72	86	44	58	22	32	54	13
ROM R 8322	69	92	107	132	88	249	148	73	49	33	21	20	25	142	24	72	90	46	61	28	31	57	18
ROM R 4419	63	88	102	118	80	251	145	69	47	33	16	21	21	131	19	67	84	41	58	19	31	54	13
ROM R 4404	62	88	108	120	80	252	142	67	49	32	17	21	24	133	24	62	94	42	52	22	29	56	16
UCMVZ 191313	69	95	105	130	86	256	157	73	48	35	20	22	21	143	22	70	84	42	62	22	34	56	13
ROM R 4410	64	92	111	122	74	257	147	73	48	34	15	26	21	137	22	68	87	43	45	19	30	54	15
UCMVZ 191314	67	93	100	130	86	257	153	72	44	31	18	23	20	138	19	70	83	41	58	20	30	55	14
ROM R 8347	74	97	115	127	86	257	155	73	50	35	20	18	21	151	24	71	95	46	55	24	34	53	16
ROM R 8323	68	90	109	130	86	261	153	77	56	36	20	23	24	151	27	74	90	44	65	23	35	54	15
ROM R 8346	75	102	115	142	90	267	160	79	53	37	20	23	24	155	22	79	94	47	65	23	36	61	14
ROM R 4420	69	94	106	124	81	267	144	74	51	35	18	23	23	141	22	69	88	45	56	24	30	57	14
UCMZ R 1975.229	71	97	111	142	95	272	161	77	49	36	21	26	23	144	21	77	90	47	62	25	29	56	14
ROM R 8341	74	102	114	138	93	279	178	81	51	32	23	27	26	158	23	83	92	47	64	24	38	56	15
ROM R 8331	78	112	125	149	98	281	168	82	47	40	20	25	27	164	25	86	108	52	66	27	39	60	16
ROM R 8344	74	103	121	149	98	282	173	89	53	35	21	25	21	164	28	85	99	49	67	26	40	62	16
AMNH 66643	89	112	131	172	105	285	177	73	45	32	24	21	26	151	26	76	107	51	61	22	42	69	17
ROM R 4421	77	107	121	148	102	287	156	79	51	32	24	24	23	156	23	82	98	50	58	27	37	59	15
ROM R 4407	81	115	134	154	104	288	170	81	45	38	23	26	26	152	25	76	103	53	52	22	39	60	17
ROM R 4409	80	115	129	158	102	298	180	82	54	40	21	26	27	160	21	81	104	54	61	25	37	69	16
TMP 1990.7.194	85	115	130	168	108	301	174	83	54	37	20	22	25	158	24	89	99	55	64	25	43	59	16
ROM R 4413	95	117	132	155	99	306	178	87	55	42	22	29	27	164	28	84	104	51	62	25	42	62	16
ROM R 8330	82	115	127	150	108	309	192	90	52	37	26	27	27	170	24	87	110	53	77	29	41	67	16
ROM R 388	96	133	160	206	137	315	176	92	65	47	23	31	32	161	32	99	134	72	69	39	41	79	17
AMNH 43316	86	111	133	175	110	315	175	92	51	50	27	24	27	162	29	73	112	53	67	29	44	68	17
ROM herp 46539	88	111	123	157	105	324	188	92	64	35	21	26	23	176	28	88	108	51	73	31	38	67	17
ROM R 4408	115	131	151	183	115	324	190	100	55	42	24	29	29	169	29	95	127	59	64	24	49	69	18
ROM 4412	79	112	131	154	95	325	172	86	56	38	22	28	24	169	24	83	102	52	59	25	39	70	17
AMNH uncat.	88	113	131	154	97	325	178	88	52	40	18	27	30	165	26	71	115	65	73	27	43	55	17
ROM R 690	85	111	126	159	108	331	186	85	64	36	22	27	23	174	29	88	109	52	73	30	39	67	16
ROM R 600	107	142	173	208	143	334	181	89	61	44	21	26	28	151	20	93	135	77	66	34	44	75	19
ROM R 8336	88	120	130	162	120	337	204	100	60	36	29	30	29	183	24	98	108	56	77	32	45	69	16
YPM 580	90	119	137	154	102	338	198	96	53	39	24	30	30	177	25	70	109	54	78	29	41	77	15
ROM R 8342	101	136	152	185	126	344	213	102	68	44	24	30	31	199	30	105	134	68	81	32	52	70	19
ROM R 4416	99	142	159	199	123	349	218	98	58	42	22	28	25	197	32	111	131	66	72	28	48	68	17
ROM R 4417	99	136	150	186	119	352	205	111	59	43	24	33	30	189	27	107	130	69	79	32	44	66	16
759	104	131	154	188	113	365	213	100	58	42	29	30	30	200	30	81	123	64	80	34	48	83	17
ROM R 8343	108	152	172	204	141	367	229	115	66	47	29	26	30	221	34	112	133	71	76	33	52	81	19
ROM R 8327	115	151	174	210	141	368	233	111	62	51	32	38	42	202	32	117	149	73	80	34	52	79	20
ROM R 8326	110	153	179	218	140	371	231	109	65	50	30	36	41	198	27	125	142	74	80	34	52	79	20
ROM R 4422	100	138	156	185	114	373	216	102	59	37	27	34	29	203	30	109	130	68	82	32	46	76	19
AMNH 71621	111	141	161	217	125	385	217	117	57	39	29	33	32	208	32	93	143	72	84	34	66	88	17
AMNH 46842	127	150	175	209	135	388	226	120	59	42	25	34	29	205	28	104	143	81	93	43	59	92	18
uncat. skull	119	133	153	190	117	390	230	111	63	40	30	31	33	220	36	90	131	65	90	35	51	84	20
AMNH 43315	113	154	181	240	160	390	227	118	47	47	29	34	39	216	34	103	153	83	92	40	59	99	20
ROM R 8329	115	162	171	226	146	391	254	115	64	51	31	39	37	218	32	132	148	73	86	36	52	75	19
ROM R 4402	131	149	172	218	133	398	231	115	70	52	26	29	32	214	32	128	152	75	92	34	56	91	19
ROM R 4401	112	162	180	210	139	399	229	115	62	46	30	32	31	206	32	121	145	78	86	35	52	93	18
579	122	148	163	196	115	410	248	114	57	41	28	36	31	230	29	103	134	66	94	31	52	87	15
ROM R 4415	124	163	179	232	155	432	265	122	67	50	26	35	36	228	31	125	155	80	86	35	57	79	19
ROM 4411	135	190	210	259	166	479	275	139	74	49	33	39	33	241	32	160	180	86	101	35	57	89	21
ROM R 494	140	196	212	282	182	497	302	148	71	45	41	39	39	262	34	153	191	95	99	47	66	99	23
AMNH 31563	149	186	212	259	168	550	287	141	72	51	40	38	39	255	35	110	181	93	97	46	68	101	22
ROM R 8324	178	237	249	320	186	563	372	186	86	54	45	49	47	317	48	191	229	126	150	69	86	128	23
YPM uncat. skull	181	225	270	350	225	610	315	180	117	88	40	63	66	295	68	157	255	125	115	47	94	143	37
USNM 06611	195	222	247	326	175	628	365	179	91	51	42	51	41	332	48	160	215	108	135	67	81	133	26
USNM 029573	193	240	257	338	199	632	388	185	85	64	43	56	56	331	37	173	210	113	137	58	88	111	25
ROM 51011	203	274	289	371	243	689	441	195	84	57	51	53	47	371	62	181	236	132	141	64	60	139	32
